# Supplementary material for: A high-resolution unified observational data product of mesoscale convective systems and isolated deep convection in the United States for 2004–2017
Source: Copernicus journal article supplement (doi:10.5194/essd-2020-151), 2020-10-14
Supplement: Supplementary file 1 [file essd-2020-151-supplement.pdf]

1

Supporting information for

2

# A high-resolution unified observational data product of mesoscale convective systems and isolated deep convection in the United States for 2004 – 2017

3

4

5

Jianfeng Li<sup>1\*</sup>, Zhe Feng<sup>1</sup>, Yun Qian<sup>1\*</sup>, L. Ruby Leung<sup>1</sup>

6

7

<sup>1</sup> Atmospheric Sciences and Global Change Division, Pacific Northwest National

8

Laboratory, Richland, Washington

9

10

\* *Correspondence to* Jianfeng Li (jianfeng.li@pnnl.gov) and Yun Qian

11

(yun.qian@pnnl.gov)

12 **Table captions**

13 **Table S1.** Summary of source datasets used to develop the MCS/IDC data product

14 **Table S2.** The classification criteria of the Storm Labeling in Three Dimensions (SL3D)  
15 algorithm in this study

16 **Table S3.** Annual mean precipitation amounts and intensities for different types of  
17 precipitation in different regions of the US for 2004 – 2017

18 **Table S4.** Annual mean seasonal precipitation amounts and intensities for different  
19 types of precipitation in different regions of the US for 2004 – 2017

20 **Table S5.** Annual and seasonal mean characteristics of MCS and IDC events in the data  
21 product domain for 2004 – 2017 by using the new MCS definition

22 **Table S6.** Annual mean precipitation amounts and intensities for different types of  
23 precipitation in different regions of the US for 2004 – 2017 by using the new MCS  
24 definition

25 **Table S7.** Annual mean seasonal precipitation amounts and intensities for different  
26 types of precipitation in different regions of the US for 2004 – 2017 by using the new  
27 MCS definition

28

29 **Figure captions**

30 **Figure S1.** Schematic of the FLEXTRKR algorithm.

31 **Figure S2.** Schematic of CCS merging and splitting.

32 **Figure S3.** An example of CCS merging and splitting from 2005-05-07T4:00:00Z –  
33 T9:00:00Z. Cloud 1 and Cloud 2 at 5:00:00Z merged into Cloud 1 at 6:00:00Z. And  
34 Cloud 1 at 7:00:00Z at least split to Cloud 1 and Cloud 3 at 8:00:00Z.

35 **Figure S4.** Schematic of “merge” tracks and “split” tracks.

36 **Figure S5.** Definition of MCSs and IDC.

37 **Figure S6.** Seasonal cumulative distribution functions (CDFs) of PF-based lifetimes for  
38 (a) MCSs and (b) IDC in the data product domain for 2004 – 2017. Red lines denote  
39 spring, blue lines denote summer, green lines denote autumn, and black lines denote  
40 winter.

41 **Figure S7.** Annual mean monthly diurnal cycles of initiated MCS (left panel) and IDC  
42 (right panel) numbers in the data product domain for 2004 – 2017. Here, we define that  
43 an MCS or IDC event initiates when the first PF appears. Therefore, we can derive the  
44 initiated time of all MCS and IDC events, which is the basis of this figure. For example,  
45 on average, more than 7 MCSs initiated at 14:00 Local Time (LT) every June between  
46 2004 and 2017.

47 **Figure S8.** Distributions of the fractions of different types of precipitation in each  
48 season. Here, precipitation refers to annual mean seasonal amounts for 2004 – 2017. We  
49 exclude hourly data with precipitation  $\leq 1 \text{ mm h}^{-1}$  in the calculation. The first row is for  
50 total precipitation, the second for MCS precipitation, the third for IDC precipitation, and  
51 the fourth for stratiform precipitation. The first column shows spring precipitation, the  
52 second for summer, the third for autumn, and the fourth for winter.

53 **Figure S9.** Distributions of annual mean seasonal precipitation intensities for different  
54 types of precipitation for 2004 – 2017. The first row is for total precipitation, the second  
55 for MCS precipitation, the third for IDC precipitation, and the fourth for stratiform  
56 precipitation. The first column shows spring precipitation, the second for summer, the  
57 third for autumn, and the fourth for winter. We exclude hourly data with precipitation  $\leq$   
58  $1 \text{ mm h}^{-1}$  in the calculation.

59 **Figure S10.** Monthly mean diurnal cycles of precipitation intensities for MCSs (a, d, g,  
60 j), IDC (b, e, h, k), and stratiform (c, f, i, l) in the NGP (a, b, c), SGP (d, e, f), SE (g, h,  
61 i), and NE (j, k, l) during 2004 – 2017.

62 **Figure S11.** An example of Stage IV erroneous precipitation. Stage IV shows a large  
63 area of intense precipitation suddenly appearing at 2011-05-02T12:00:00Z, which then

64 unexpectedly disappears at 13:00:00Z, comes back abruptly at 14:00:00Z, and finally  
65 goes away immediately at 17:00:00Z.

66 **Figure S12.** Distribution of the fraction of valid Stage IV precipitation data for 2004 –  
67 2017. Here, “valid” means that precipitation data are available and reasonable. The  
68 erroneous precipitation discussed in the main manuscript is unreasonable and invalid.

69 **Figure S13.** Distributions of the fractions of available radar reflectivity data for 2004 –  
70 2017 at different vertical levels. As long as radars scan a grid cell, we think it as  
71 “available” even though there is no echo.

72

73 **Table S1.** Summary of source datasets used to develop the MCS/IDC data product

| Dataset name                | NCEP/ CPP L3 half-hourly<br>4 km Global Merged IR                                                                               | Three-dimensional Gridded<br>NEXRAD Radar (Gridrad)                                         | NCEP Stage IV<br>precipitation                                                              | ERA5 melting level                                                                                                                                                                                        |
|-----------------------------|---------------------------------------------------------------------------------------------------------------------------------|---------------------------------------------------------------------------------------------|---------------------------------------------------------------------------------------------|-----------------------------------------------------------------------------------------------------------------------------------------------------------------------------------------------------------|
| Dataset version             | V 1                                                                                                                             | V 3.1                                                                                       | V 1.0                                                                                       |                                                                                                                                                                                                           |
| DOI                         | 10.5067/P4HZB9N27EKU                                                                                                            | 10.5065/D6NK3CR7                                                                            | 10.5065/D69Z93M3                                                                            | 10.24381/cds.adbb2d47                                                                                                                                                                                     |
| URL                         | <a href="https://disc.gsfc.nasa.gov/datasets/GPM_MERGIR_1/summary">https://disc.gsfc.nasa.gov/datasets/GPM_MERGIR_1/summary</a> | <a href="https://rda.ucar.edu/datasets/ds841.0/">https://rda.ucar.edu/datasets/ds841.0/</a> | <a href="https://rda.ucar.edu/datasets/ds507.5/">https://rda.ucar.edu/datasets/ds507.5/</a> | <a href="https://cds.climate.copernicus.eu/cdsapp#!/dataset/reanalysis-era5-single-levels?tab=overview">https://cds.climate.copernicus.eu/cdsapp#!/dataset/reanalysis-era5-single-levels?tab=overview</a> |
| Last access                 | Dec 28, 2019                                                                                                                    | Jan 2, 2020                                                                                 | Dec 28, 2019                                                                                | Jan 24, 2020                                                                                                                                                                                              |
| Initial spatial resolution  | Horizontal: ~ 4 km                                                                                                              | Horizontal: 0.02°<br>Vertical: 1 km                                                         | Horizontal: ~ 4 km                                                                          | Horizontal: 0.25°                                                                                                                                                                                         |
| Initial temporal resolution | 0.5 hours                                                                                                                       | 1 hour                                                                                      | 1 hour                                                                                      | 1 hour                                                                                                                                                                                                    |

74

75 **Table S2.** The classification criteria of the Storm Labeling in Three Dimensions (SL3D) algorithm in this study

| SL3D category                | Criteria                                                                                                                                                                                                                                                                                                                                                                                                                                                                 |
|------------------------------|--------------------------------------------------------------------------------------------------------------------------------------------------------------------------------------------------------------------------------------------------------------------------------------------------------------------------------------------------------------------------------------------------------------------------------------------------------------------------|
| convective                   | $Z_H^1 = 25$ dBZ echo-top height $\geq 10$ km; or $Z_H \geq 45$ dBZ above $(Z_{\text{melt}}^2 + 1)$ km; or $Z_H$ peakedness <sup>3</sup> exceeding thresholds <sup>4</sup> in at least 30% of the echo column between surface and 9 km.<br>After the above filtering, exclude isolated convective grid points. Finally, grid points that have $Z_{H\text{max}}^5 \geq 25$ dBZ and are immediately adjacent to other convective grid points are classified as convective. |
| precipitating stratiform     | $Z_H \geq 20$ dBZ at 3 km; or $Z_H \geq 10$ dBZ at 1 km or 2 km                                                                                                                                                                                                                                                                                                                                                                                                          |
| non-precipitating stratiform | no echo or $Z_H < 20$ dBZ at 3 km, and echo presents above 3 km. If no echo at 3 km – 5 km, but echo presents above 5 km, classified as an anvil.                                                                                                                                                                                                                                                                                                                        |
| anvil                        | No echo at 3 km – 5 km, but echo presents above 5 km                                                                                                                                                                                                                                                                                                                                                                                                                     |
| convective updraft           | convective grid points satisfy: (1) $Z_{H\text{max}} \geq 40$ dBZ, and (2) $\frac{\partial Z_H}{\partial z} \geq 8$ dBZ km <sup>-1</sup> with echoes in at least six of eight horizontally adjacent grid volumes presents between the surface and 7 km.                                                                                                                                                                                                                  |

76 <sup>1</sup>  $Z_H$ : logarithmic radar reflectivity.

77 <sup>2</sup>  $Z_{\text{melt}}$ : melting level height. If temperatures at different vertical levels within a grid column are all below zero, there is no melting level. In this  
78 situation, we set  $Z_{\text{melt}} = -2$ .

79 <sup>3</sup> Peakedness is the difference between the  $Z_H$  of the grid point being evaluated and the median  $Z_H$  of a horizontal 12-km radius around the point.

80 <sup>4</sup>  $threshold = \max\left(4.0 \text{ dBZ}, 10.0 - \frac{Z_H^2}{337.5} \text{ dBZ}\right)$ .

81 <sup>5</sup>  $Z_{H\text{max}}$  denotes column max reflectivity.

82

83 **Table S3.** Annual mean precipitation amounts and intensities for different types of precipitation in different regions of the US for  
 84 2004 – 2017

|     | Precipitation amount / mm |     |     |            | Precipitation intensity / mm h <sup>-1</sup> |     |     |            |
|-----|---------------------------|-----|-----|------------|----------------------------------------------|-----|-----|------------|
|     | Total                     | MCS | IDC | Stratiform | Total                                        | MCS | IDC | Stratiform |
| NGP | 515                       | 254 | 116 | 145        | 3.3                                          | 4.3 | 3.3 | 2.4        |
| SGP | 613                       | 308 | 149 | 156        | 4.1                                          | 5.2 | 4.4 | 2.9        |
| SE  | 1,156                     | 526 | 303 | 327        | 4.5                                          | 5.2 | 5.3 | 3.3        |
| NE  | 889                       | 324 | 228 | 337        | 3.2                                          | 3.7 | 3.6 | 2.6        |

85

86 **Table S4.** Annual mean seasonal precipitation amounts and intensities for different types of precipitation in different regions of the  
 87 US for 2004 – 2017

|     |        | Precipitation amount / mm |     |     |            | Precipitation intensity / mm h <sup>-1</sup> |     |     |            |
|-----|--------|---------------------------|-----|-----|------------|----------------------------------------------|-----|-----|------------|
|     |        | Total                     | MCS | IDC | Stratiform | Total                                        | MCS | IDC | Stratiform |
| NGP | spring | 150                       | 78  | 31  | 40         | 2.9                                          | 3.6 | 2.8 | 2.2        |
|     | summer | 214                       | 117 | 47  | 50         | 4.2                                          | 5.0 | 4.5 | 3.0        |
|     | autumn | 109                       | 43  | 27  | 39         | 2.9                                          | 3.9 | 3.1 | 2.3        |
|     | winter | 42                        | 15  | 11  | 15         | 1.9                                          | 2.4 | 1.9 | 1.7        |
| SGP | spring | 176                       | 119 | 27  | 30         | 4.2                                          | 5.2 | 3.9 | 2.9        |
|     | summer | 200                       | 83  | 71  | 47         | 4.7                                          | 5.5 | 5.3 | 3.2        |
|     | autumn | 150                       | 62  | 36  | 52         | 4.1                                          | 5.3 | 4.6 | 3.0        |
|     | winter | 87                        | 44  | 16  | 27         | 2.8                                          | 3.6 | 2.6 | 2.2        |
| SE  | spring | 275                       | 157 | 52  | 66         | 4.6                                          | 5.3 | 4.8 | 3.3        |
|     | summer | 367                       | 112 | 156 | 99         | 5.2                                          | 5.7 | 6.1 | 3.7        |
|     | autumn | 249                       | 109 | 55  | 85         | 4.6                                          | 5.4 | 5.5 | 3.5        |
|     | winter | 265                       | 147 | 40  | 78         | 3.8                                          | 4.7 | 3.7 | 2.8        |
| NE  | spring | 230                       | 97  | 56  | 78         | 2.9                                          | 3.5 | 3.2 | 2.4        |
|     | summer | 276                       | 80  | 85  | 111        | 4.2                                          | 4.9 | 5.0 | 3.3        |
|     | autumn | 218                       | 75  | 49  | 94         | 3.2                                          | 3.8 | 3.6 | 2.6        |
|     | winter | 165                       | 72  | 39  | 55         | 2.4                                          | 2.9 | 2.4 | 2.1        |

88



89

**Table S5.** Annual and seasonal mean characteristics of MCS and IDC events in the data product domain for 2004 – 2017 by using the new MCS definition<sup>1</sup>

|                                                                          | MCS     |         |        |         |         | IDC    |        |        |        |        |
|--------------------------------------------------------------------------|---------|---------|--------|---------|---------|--------|--------|--------|--------|--------|
|                                                                          | annual  | spring  | summer | autumn  | winter  | annual | spring | summer | autumn | winter |
| CCS-based lifetime / hour                                                | 17.1    | 17.6    | 16.0   | 18.2    | 20.0    | 2.0    | 2.1    | 2.0    | 2.0    | 2.6    |
| CCS area / km <sup>2</sup>                                               | 135,541 | 172,517 | 93,828 | 139,837 | 295,931 | 6,657  | 9,379  | 4,314  | 6,352  | 21,484 |
| CCS major axis length / km                                               | 579     | 667     | 475    | 615     | 935     | 99     | 117    | 85     | 99     | 173    |
| PF-based lifetime / hour                                                 | 15.0    | 15.6    | 14.1   | 15.8    | 17.1    | 1.6    | 1.6    | 1.6    | 1.6    | 1.8    |
| Major axis length of the largest PF / km                                 | 321     | 357     | 264    | 357     | 518     | 63     | 69     | 55     | 68     | 93     |
| PF convective area / km <sup>2</sup>                                     | 6,119   | 6,468   | 6,091  | 5,897   | 5,697   | 477    | 496    | 463    | 487    | 520    |
| PF stratiform area / km <sup>2</sup>                                     | 28,570  | 34,718  | 17,997 | 34,607  | 67,902  | 1,205  | 1,559  | 774    | 1,517  | 3,113  |
| PF mean convective rain rate / mm h <sup>-1</sup>                        | 4.5     | 4.0     | 4.8    | 4.6     | 3.9     | 4.1    | 3.4    | 4.5    | 4.3    | 3.0    |
| PF mean stratiform rain rate /mm h <sup>-1</sup>                         | 2.7     | 2.4     | 2.8    | 2.7     | 2.3     | 2.8    | 2.5    | 3.0    | 2.9    | 2.3    |
| Area with $Z_{Hmax} \geq 45$ dBZ within the largest PF / km <sup>2</sup> | 791     | 862     | 850    | 617     | 563     | 54     | 56     | 57     | 47     | 42     |
| PF mean convective 20-dBZ echo-top height / km                           | 6.6     | 6.2     | 7.2    | 6.1     | 5.0     | 6.5    | 6.1    | 7.0    | 6.2    | 5.0    |
| Area of the largest CCF / km <sup>2</sup>                                | 2,094   | 2,081   | 2,317  | 1,754   | 1,392   | 339    | 355    | 333    | 337    | 347    |
| Major axis length of the largest CCF / km                                | 95      | 96      | 99     | 88      | 82      | 29     | 30     | 28     | 29     | 30     |
| Max 30-dBZ echo-top height of the largest CCF / km                       | 12.7    | 12.2    | 13.9   | 11.6    | 9.4     | 7.0    | 6.4    | 7.6    | 6.5    | 5.0    |
| Max 40-dBZ echo-top height of the largest CCF / km                       | 10.4    | 10.2    | 11.4   | 8.9     | 7.1     | 5.4    | 5.0    | 5.9    | 5.0    | 3.7    |

<sup>1</sup> Refer to Section 4.4 in the main manuscript for the new MCS definition.

90

91

92 **Table S6.** Annual mean precipitation amounts and intensities for different types of precipitation in different regions of the US for  
 93 2004 – 2017 by using the new MCS definition

|     | Precipitation amount / mm |     |     |            | Precipitation intensity / mm h <sup>-1</sup> |     |     |            |
|-----|---------------------------|-----|-----|------------|----------------------------------------------|-----|-----|------------|
|     | Total                     | MCS | IDC | Stratiform | Total                                        | MCS | IDC | Stratiform |
| NGP | 515                       | 280 | 89  | 145        | 3.3                                          | 4.2 | 3.2 | 2.4        |
| SGP | 613                       | 344 | 113 | 156        | 4.1                                          | 5.1 | 4.4 | 2.9        |
| SE  | 1,156                     | 602 | 227 | 327        | 4.5                                          | 5.3 | 5.3 | 3.3        |
| NE  | 889                       | 371 | 181 | 337        | 3.2                                          | 3.7 | 3.5 | 2.6        |

94

95 **Table S7.** Annual mean seasonal precipitation amounts and intensities for different types of precipitation in different regions of the  
 96 US for 2004 – 2017 by using the new MCS definition

|     |        | Precipitation amount / mm |     |     |            | Precipitation intensity / mm h <sup>-1</sup> |     |     |            |
|-----|--------|---------------------------|-----|-----|------------|----------------------------------------------|-----|-----|------------|
|     |        | Total                     | MCS | IDC | Stratiform | Total                                        | MCS | IDC | Stratiform |
| NGP | spring | 150                       | 83  | 26  | 41         | 2.9                                          | 3.5 | 2.8 | 2.2        |
|     | summer | 214                       | 130 | 34  | 50         | 4.2                                          | 5.0 | 4.5 | 3.0        |
|     | autumn | 109                       | 50  | 20  | 39         | 2.9                                          | 3.8 | 3.0 | 2.3        |
|     | winter | 42                        | 17  | 9   | 16         | 1.9                                          | 2.4 | 1.9 | 1.7        |
| SGP | spring | 176                       | 126 | 20  | 30         | 4.2                                          | 5.0 | 3.9 | 2.9        |
|     | summer | 200                       | 102 | 51  | 47         | 4.7                                          | 5.5 | 5.2 | 3.2        |
|     | autumn | 150                       | 70  | 28  | 52         | 4.1                                          | 5.2 | 4.5 | 3.0        |
|     | winter | 87                        | 47  | 13  | 27         | 2.8                                          | 3.5 | 2.6 | 2.2        |
| SE  | spring | 275                       | 170 | 39  | 66         | 4.6                                          | 5.2 | 4.8 | 3.3        |
|     | summer | 367                       | 153 | 115 | 99         | 5.2                                          | 5.8 | 6.1 | 3.7        |
|     | autumn | 249                       | 122 | 42  | 85         | 4.6                                          | 5.4 | 5.5 | 3.5        |
|     | winter | 265                       | 156 | 31  | 78         | 3.8                                          | 4.6 | 3.7 | 2.8        |
| NE  | spring | 230                       | 108 | 44  | 78         | 2.9                                          | 3.5 | 3.1 | 2.4        |
|     | summer | 276                       | 99  | 66  | 111        | 4.2                                          | 4.9 | 5.0 | 3.3        |
|     | autumn | 218                       | 85  | 39  | 94         | 3.2                                          | 3.8 | 3.5 | 2.6        |
|     | winter | 165                       | 79  | 31  | 55         | 2.4                                          | 2.9 | 2.3 | 2.1        |

97

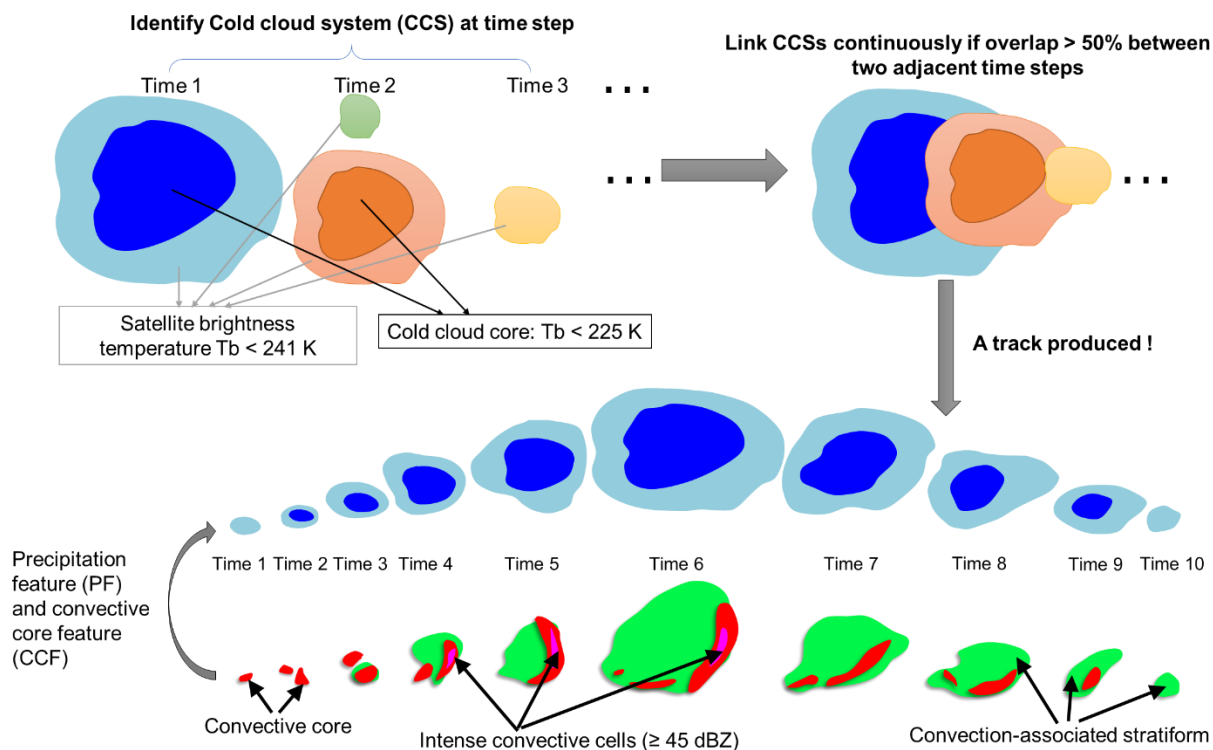

98  
99

**Figure S1.** Schematic of the FLEXTRKR algorithm.

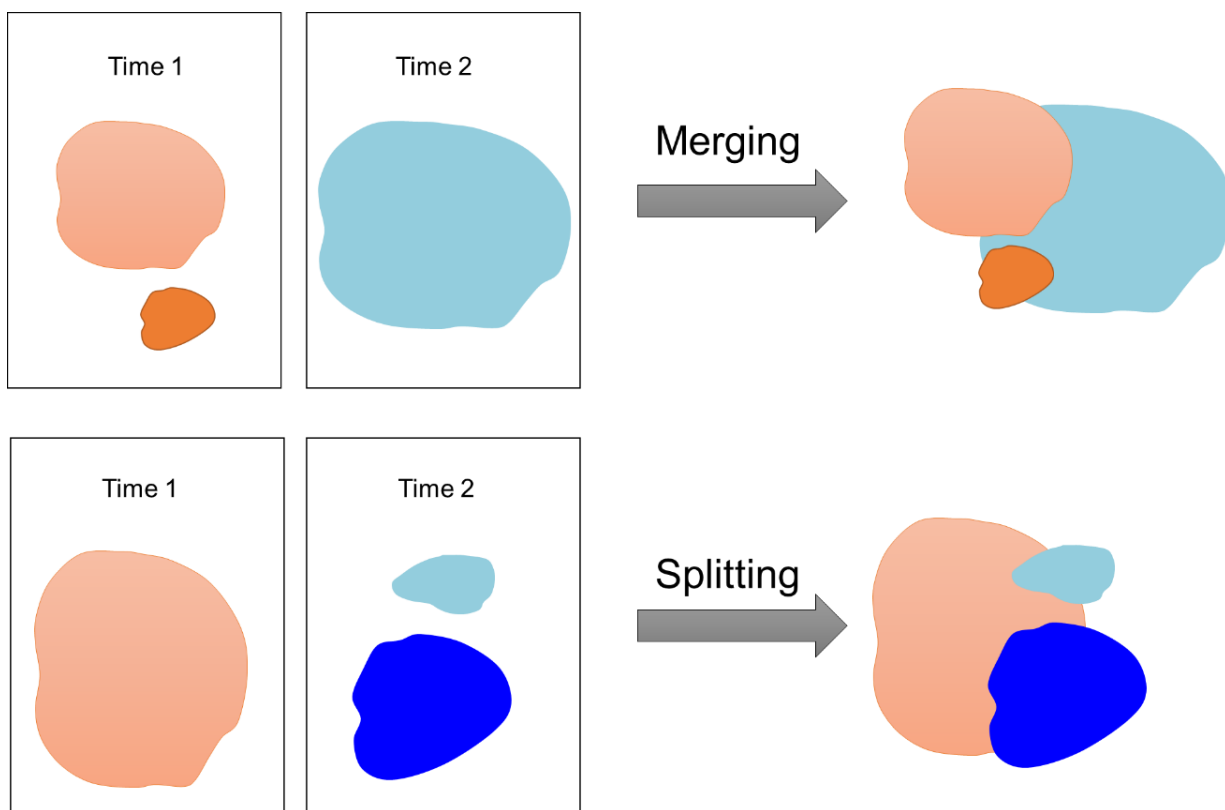

100

101 **Figure S2.** Schematic of CCS merging and splitting.

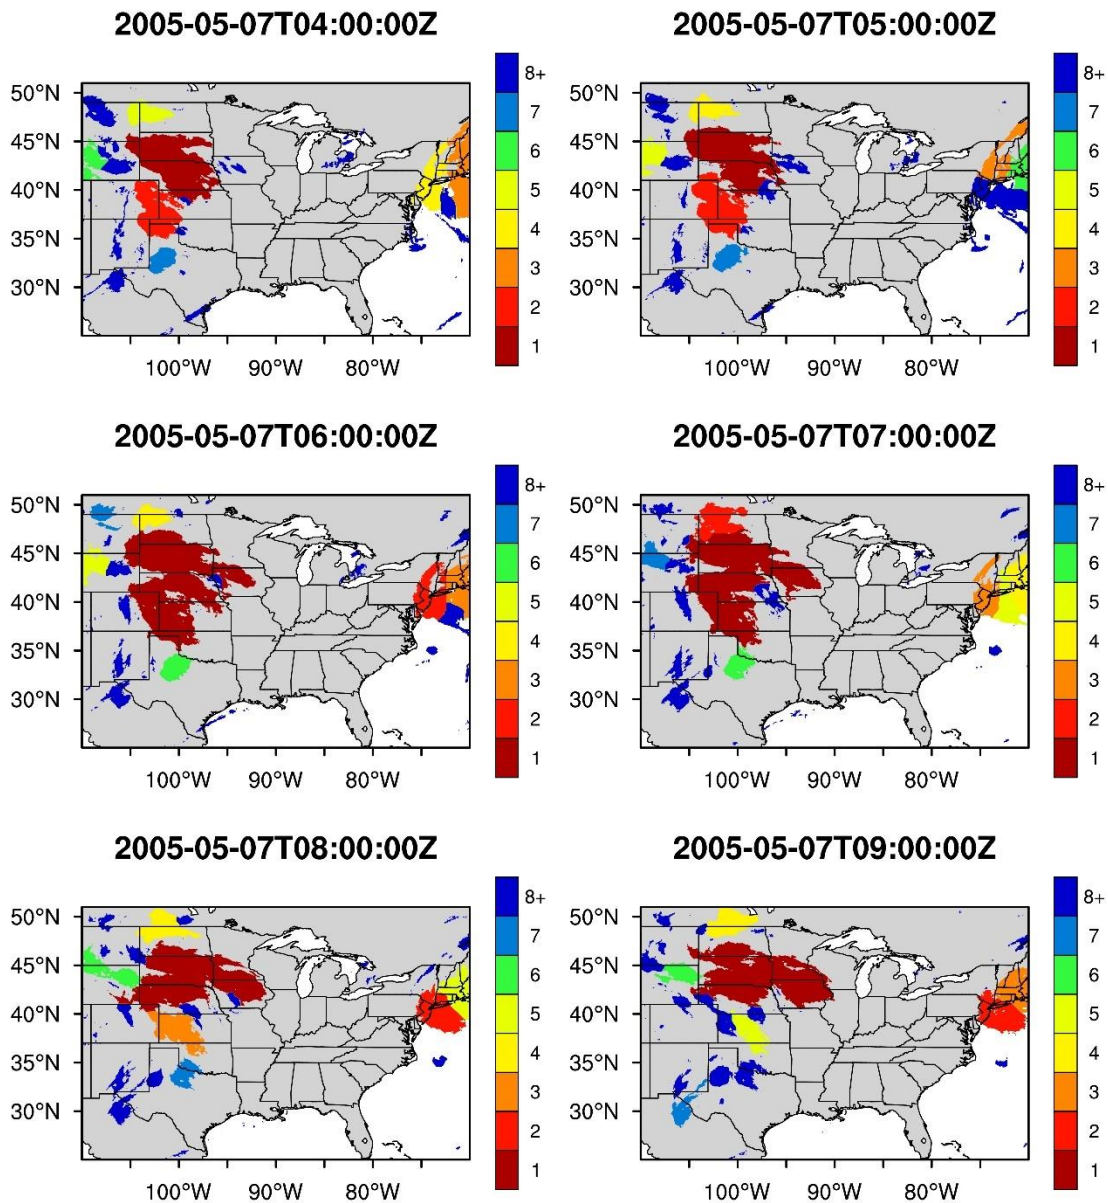

102

103 **Figure S3.** An example of CCS merging and splitting from 2005-05-07T4:00:00Z – T9:00:00Z.  
 104 Cloud 1 and Cloud 2 at 5:00:00Z merged into Cloud 1 at 6:00:00Z. And Cloud 1 at 7:00:00Z at  
 105 least split to Cloud 1 and Cloud 3 at 8:00:00Z.  
 106

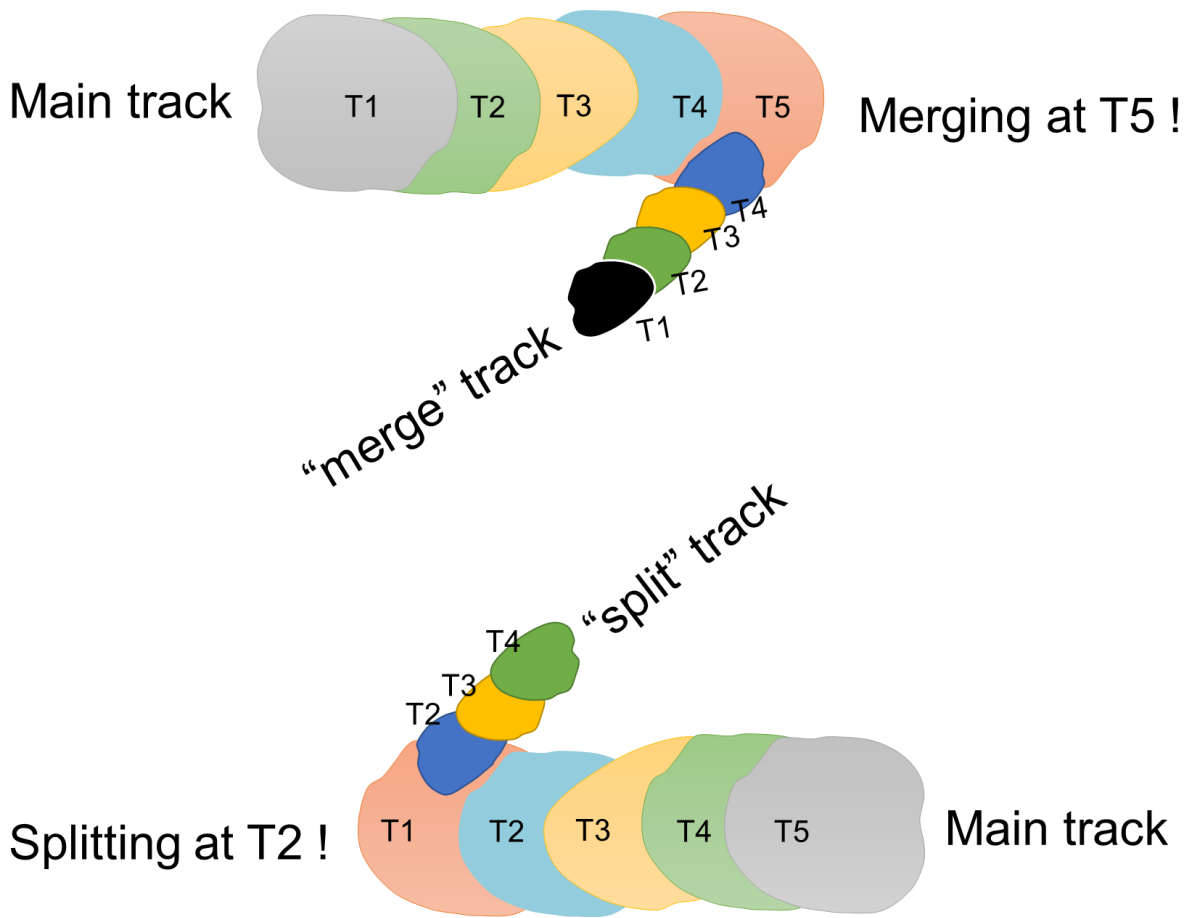

107

108 **Figure S4.** Schematic of “merge” tracks and “split” tracks.

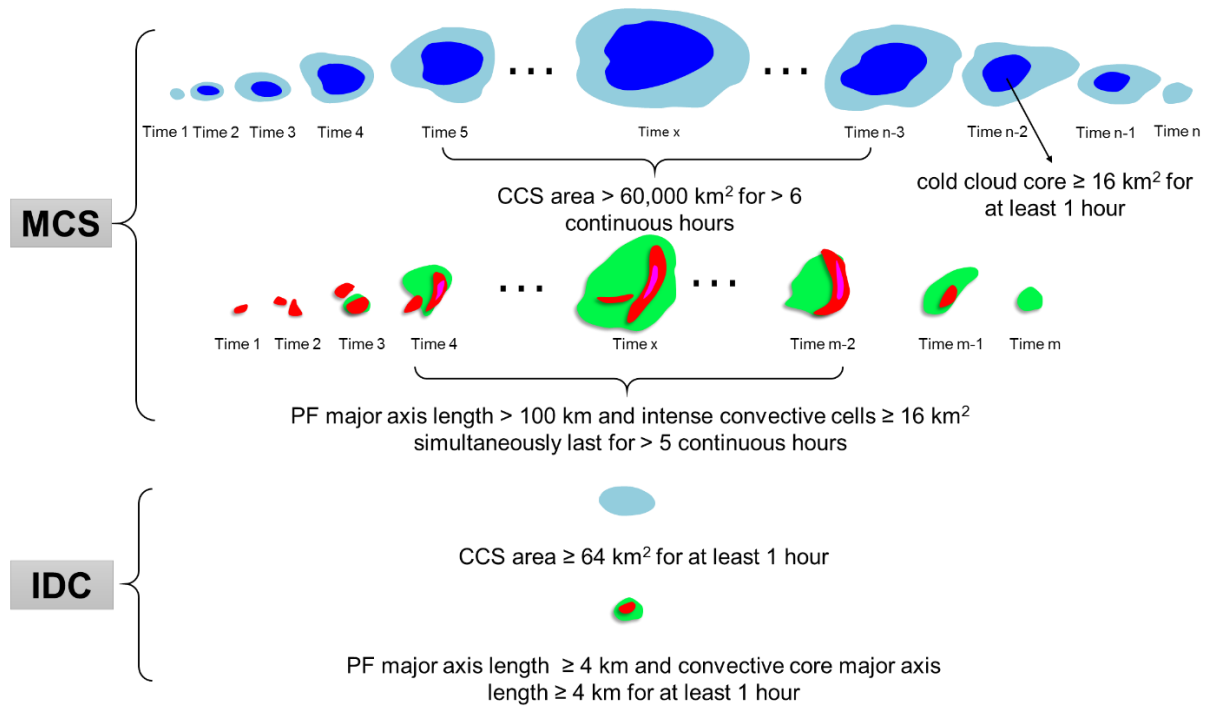

109  
110

**Figure S5.** Definition of MCSs and IDC.



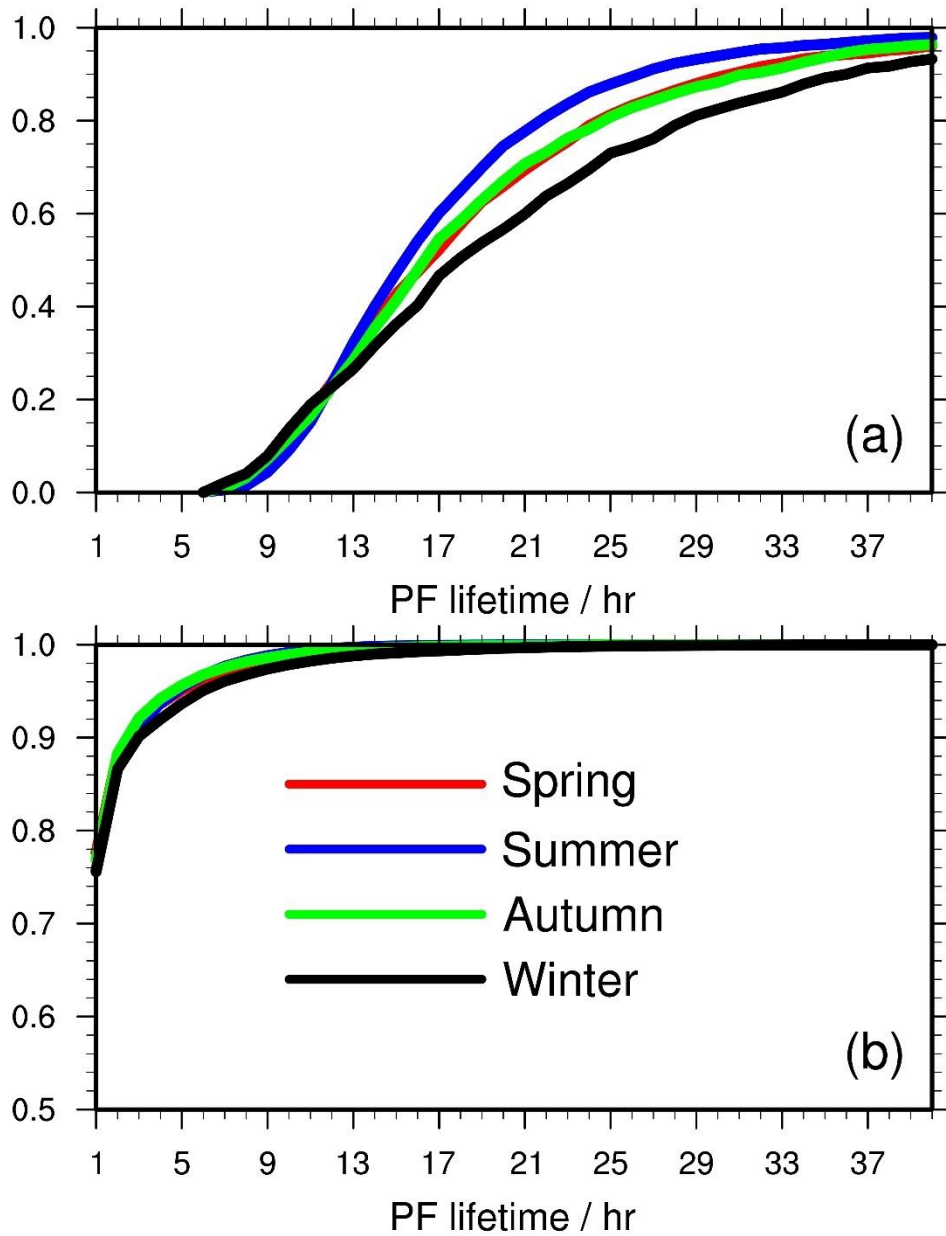

111

112 **Figure S6.** Seasonal cumulative distribution functions (CDFs) of PF-based lifetimes for (a)  
 113 MCSs and (b) IDC in the data product domain for 2004 – 2017. Red lines denote spring, blue  
 114 lines denote summer, green lines denote autumn, and black lines denote winter.  
 115

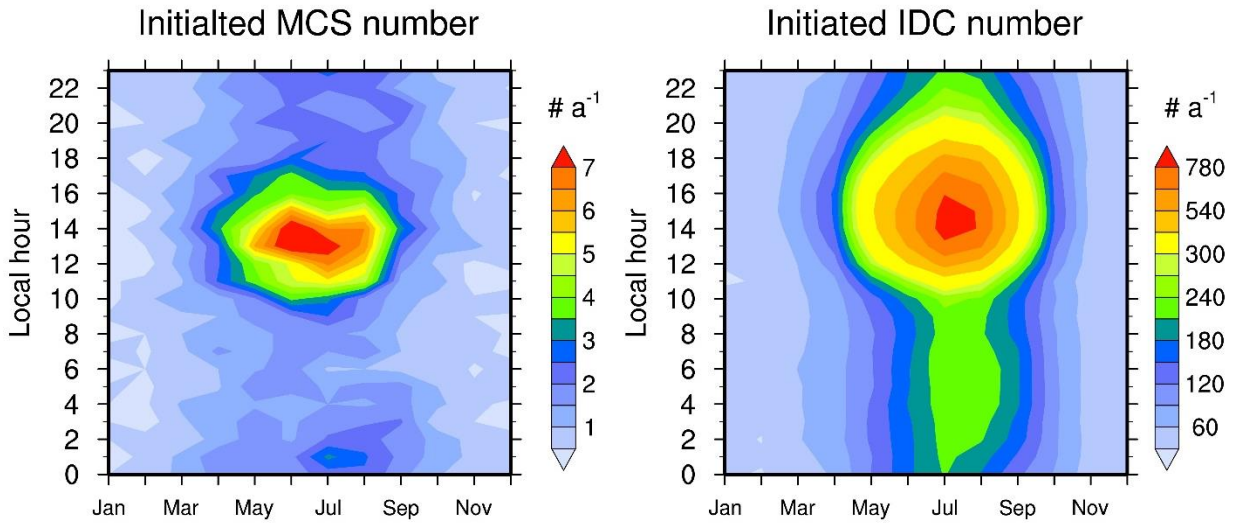

116

117 **Figure S7.** Annual mean monthly diurnal cycles of initiated MCS (left panel) and IDC (right  
 118 panel) numbers in the data product domain for 2004 – 2017. Here, we define that an MCS or  
 119 IDC event initiates when the first PF appears. Therefore, we can derive the initiated time of all  
 120 MCS and IDC events, which is the basis of this figure. For example, on average, more than 7  
 121 MCSs initiated at 14:00 Local Time (LT) every June between 2004 and 2017.  
 122

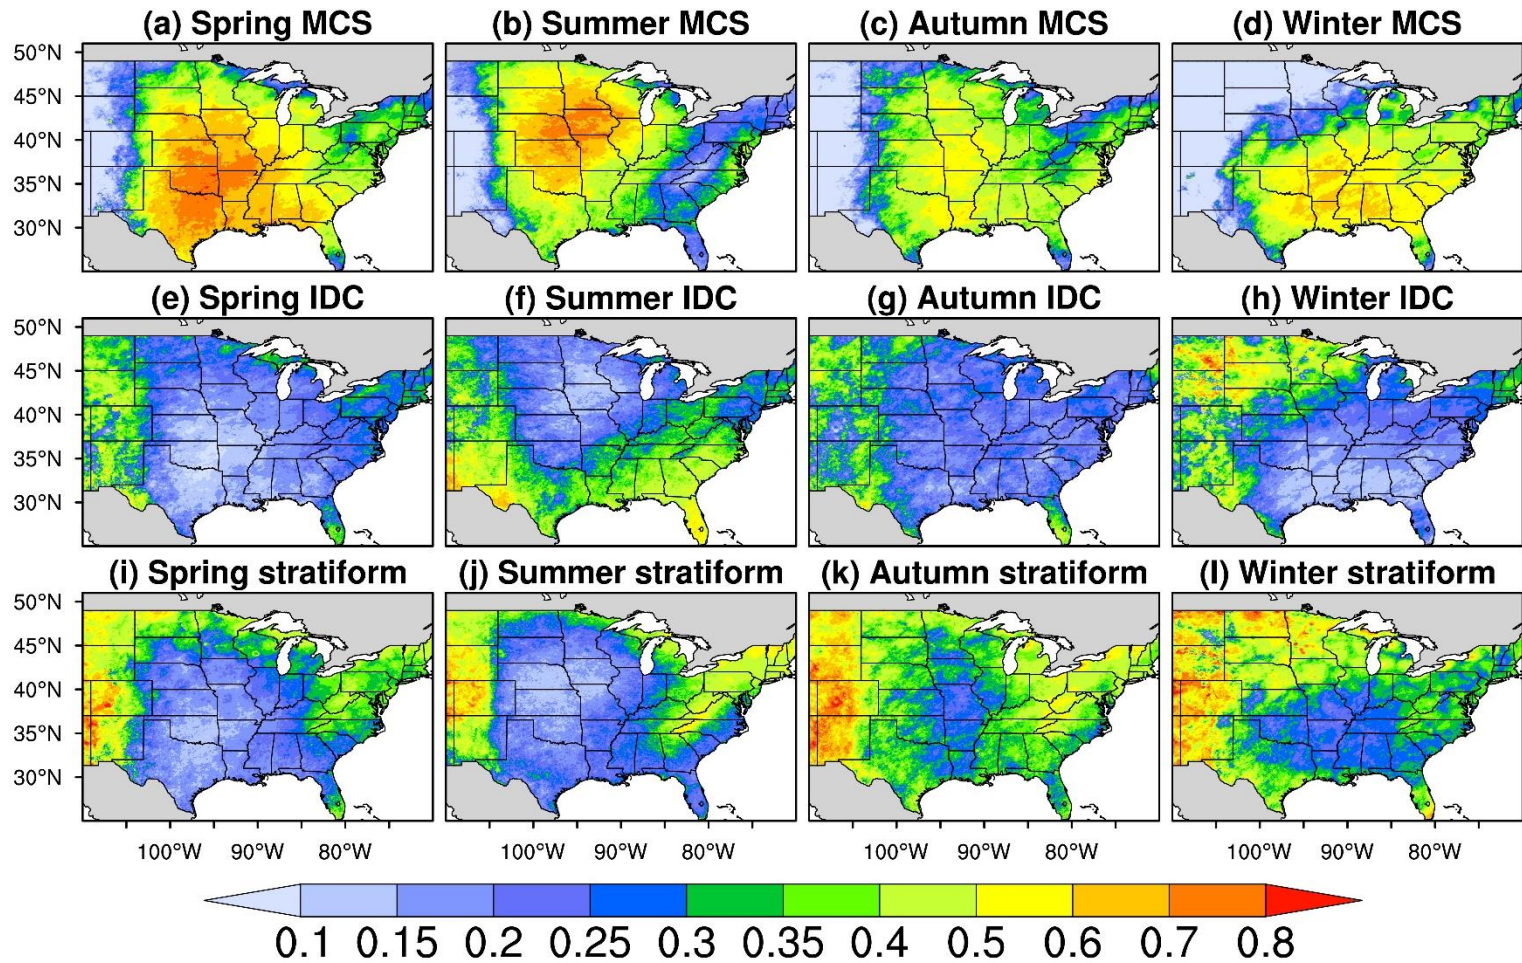

123

124 **Figure S8.** Distributions of the fractions of different types of precipitation in each season. Here, precipitation refers to annual  
 125 mean seasonal amounts for 2004 – 2017. We exclude hourly data with precipitation  $\leq 1 \text{ mm h}^{-1}$  in the calculation. The first row  
 126 is for total precipitation, the second for MCS precipitation, the third for IDC precipitation, and the fourth for stratiform  
 127 precipitation. The first column shows spring precipitation, the second for summer, the third for autumn, and the fourth for  
 128 winter.



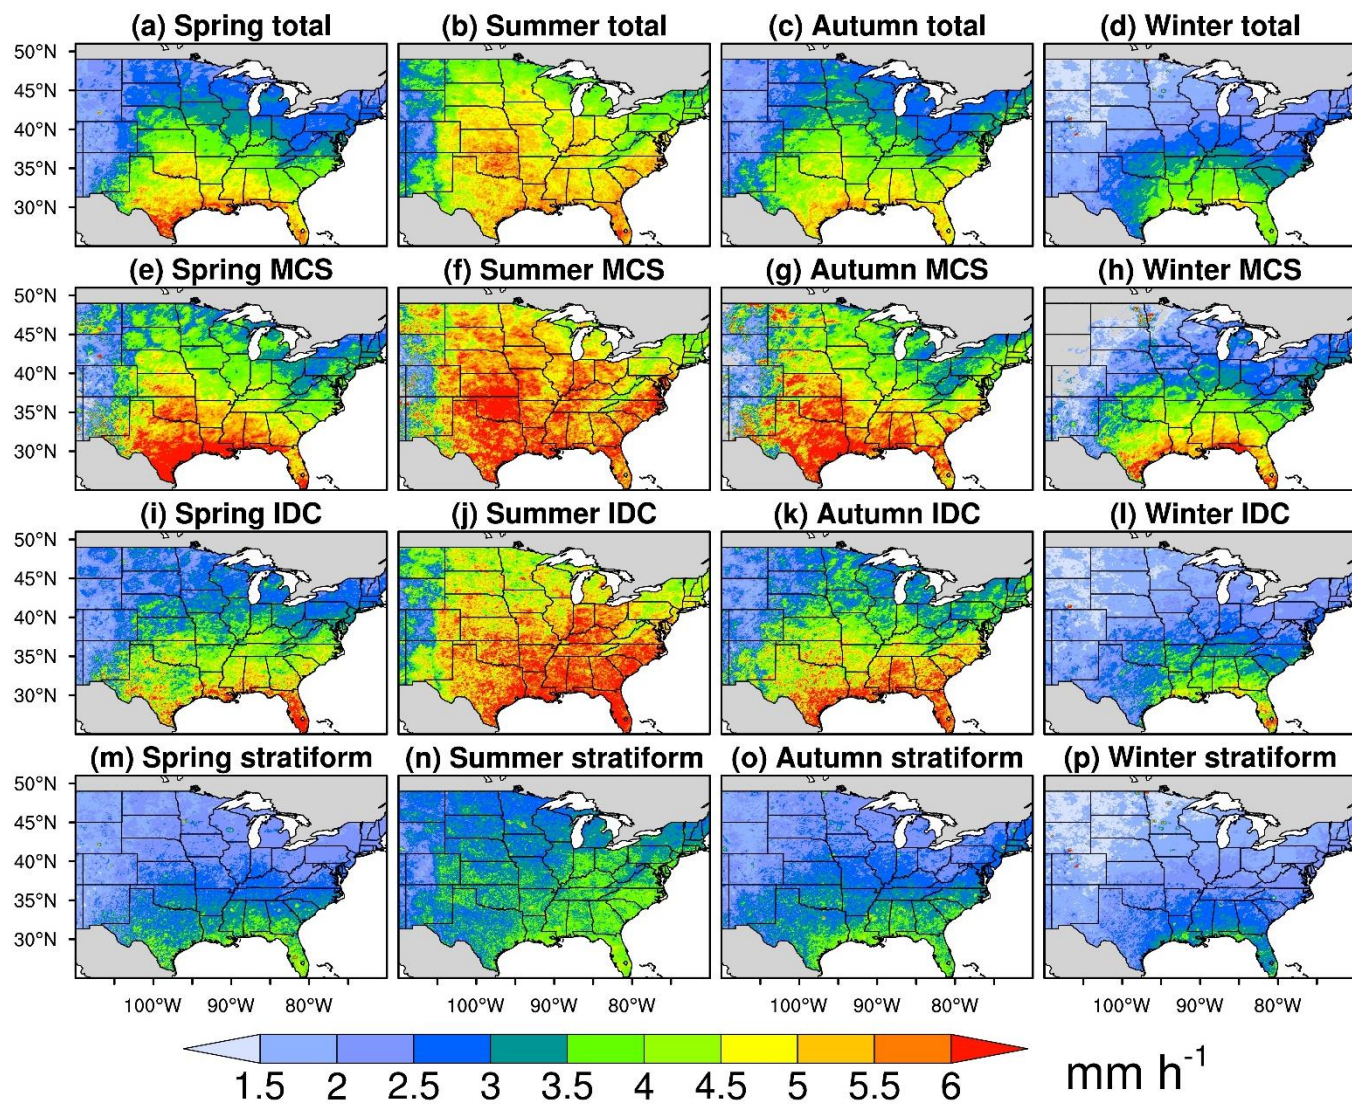

129  
130  
131

**Figure S9.** Distributions of annual mean seasonal precipitation intensities for different types of precipitation for 2004 – 2017. The first row is for total precipitation, the second for MCS precipitation, the third for IDC precipitation, and the fourth for

132 stratiform precipitation. The first column shows spring precipitation, the second for summer, the third for autumn, and the  
133 fourth for winter. We exclude hourly data with precipitation  $\leq 1 \text{ mm h}^{-1}$  in the calculation.

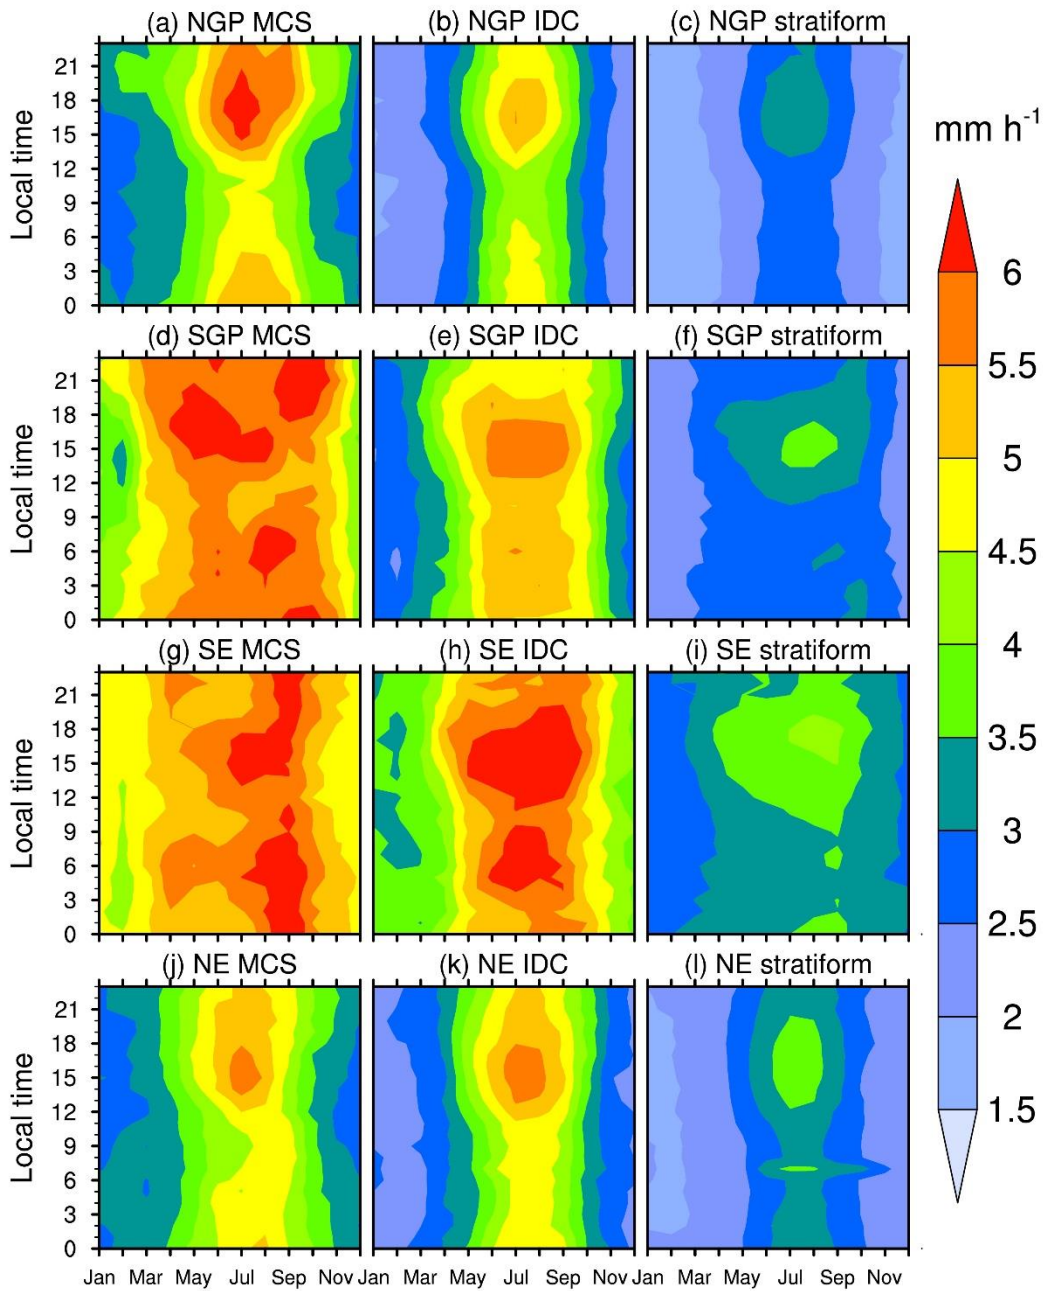

134  
 135  
 136  
 137  
 138

**Figure S10.** Monthly mean diurnal cycles of precipitation intensities for MCSs (a, d, g, j), IDC (b, e, h, k), and stratiform (c, f, i, l) in the NGP (a, b, c), SGP (d, e, f), SE (g, h, i), and NE (j, k, l) during 2004 – 2017.



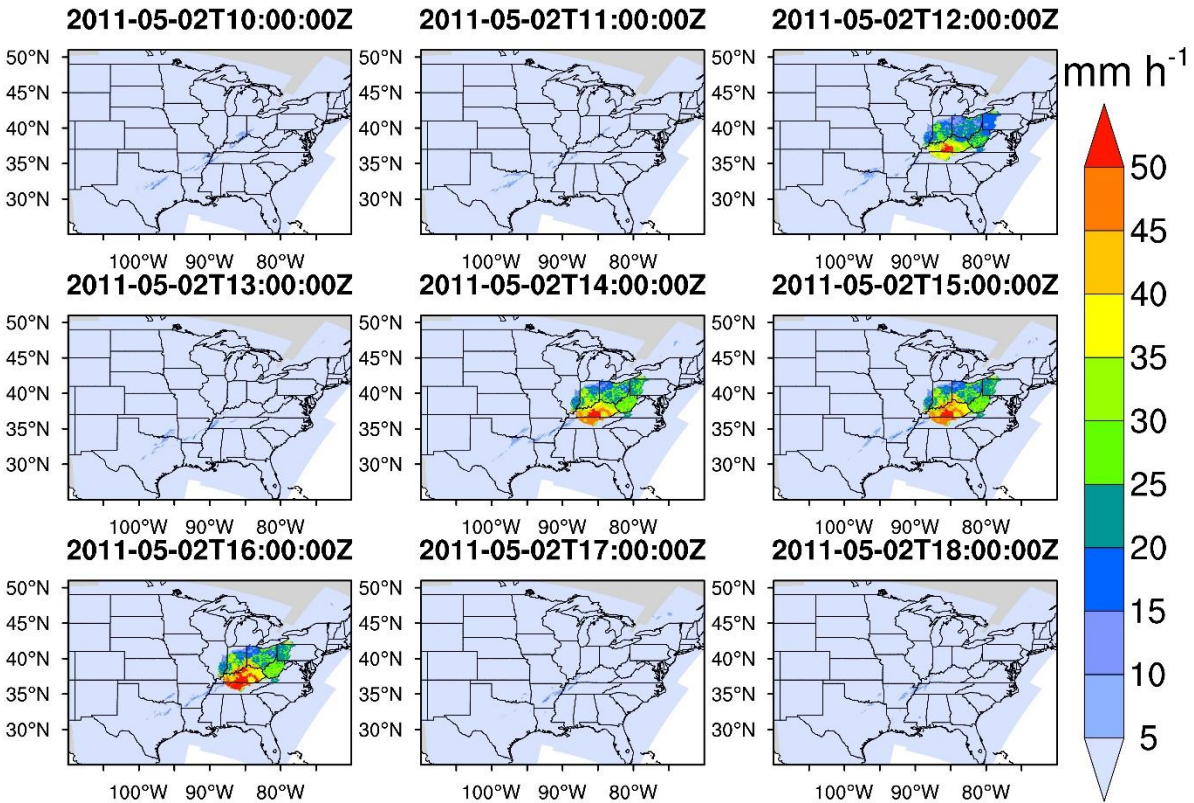

139  
 140  
 141  
 142  
 143  
 144

**Figure S11.** An example of Stage IV erroneous precipitation. Stage IV shows a large area of intense precipitation suddenly appearing at 2011-05-02T12:00:00Z, which then unexpectedly disappears at 13:00:00Z, comes back abruptly at 14:00:00Z, and finally goes away immediately at 17:00:00Z.

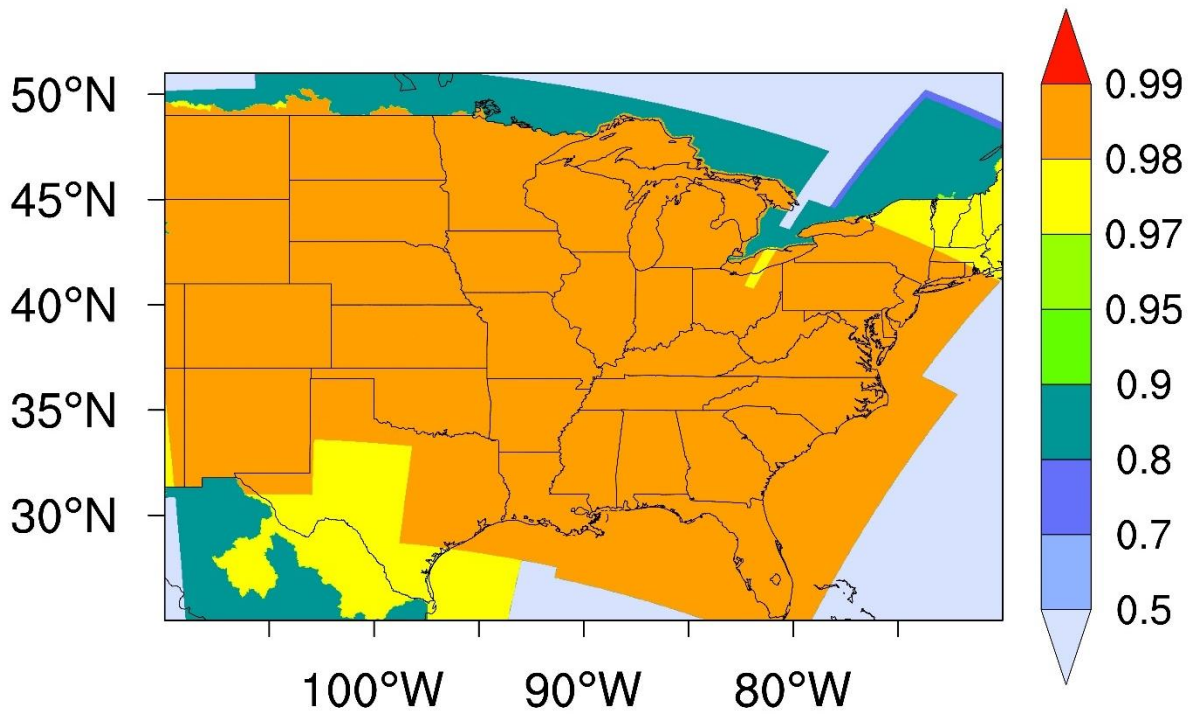

145

146 **Figure S12.** Distribution of the fraction of valid Stage IV precipitation data for 2004 – 2017.  
 147 Here, “valid” means that precipitation data are available and reasonable. The erroneous  
 148 precipitation discussed in the main manuscript is unreasonable and invalid.  
 149



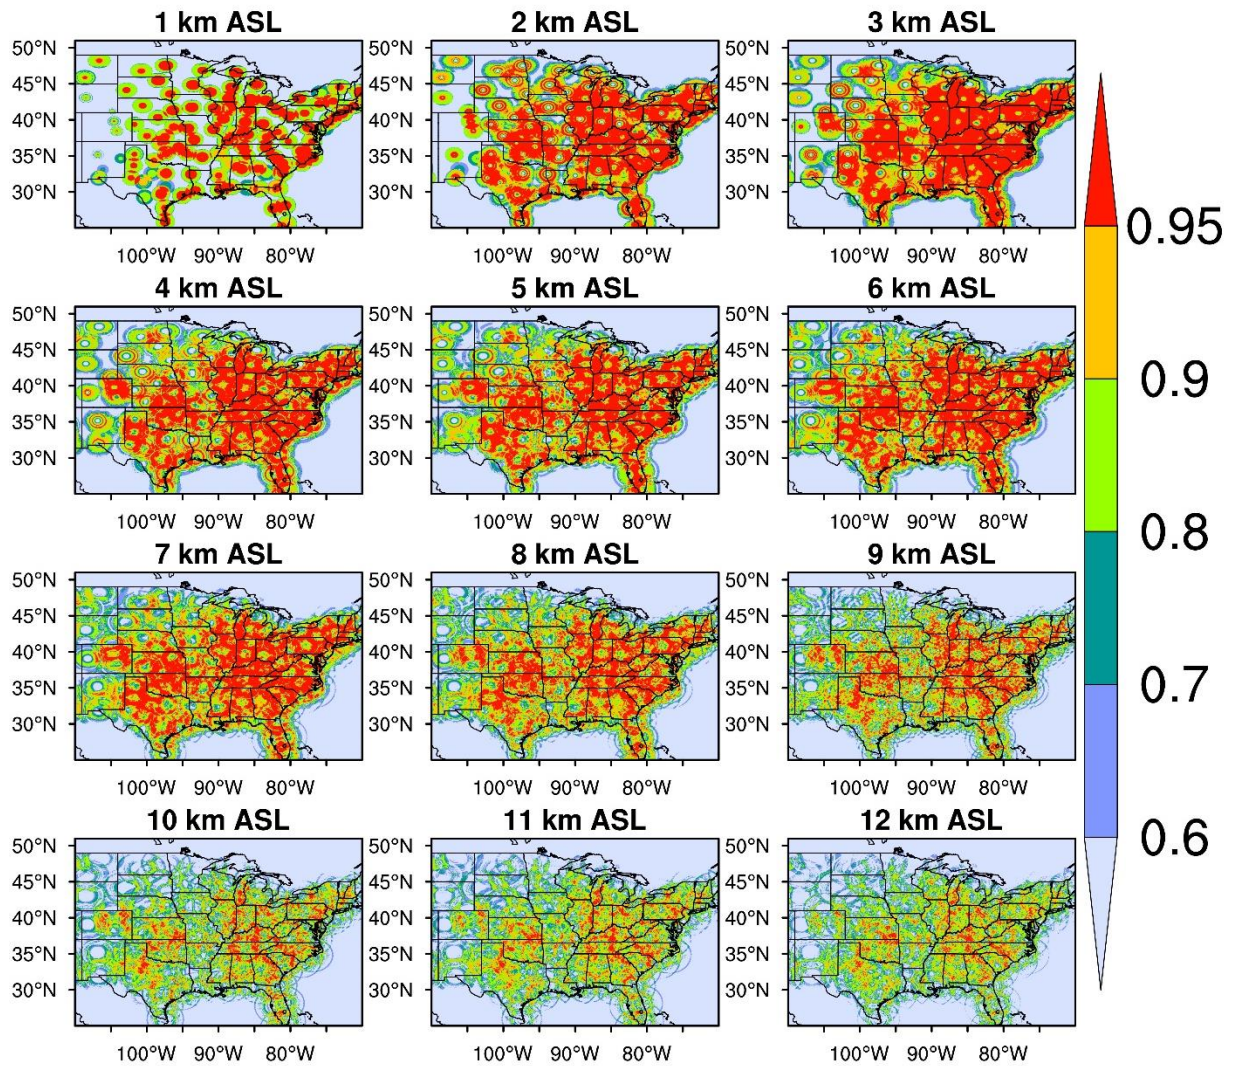

150  
 151  
 152  
 153  
 154

**Figure S13.** Distributions of the fractions of available radar reflectivity data for 2004 – 2017 at different vertical levels. As long as radars scan a grid cell, we think it as “available” even though there is no echo.
